# Supplementary material
Source: PubMed Central journal article supplement (PMC2904417)

## SUPPLEMENTARY FIGURE LEGENDS

**Supplementary Fig. 1.** Immunochemical expression of P2X3 in TRPM8 neurons. (A) Fixed section of DRG from  $Trpm8^{GFP}$  mice shows co-labeling of a fraction of TRPM8 neurons with P2X3. Bars equal 50  $\mu$ M. (B) Quantification of the percent of  $Trpm8^{GFP}$  neurons that co-label with P2X3. Data are means  $\pm$  s.e.m.

**Supplementary Fig. 2.** Immunochemical expression of parvalbumin in TRPM8 neurons. (A) Fixed section of DRG from  $Trpm8^{GFP}$  mice shows co-labeling of a fraction of TRPM8 neurons with parvalbumin. Bars equal 50  $\mu$ M. (B) Quantification of the percent of  $Trpm8^{GFP}$  neurons that co-label with parvalbumin. Data are means  $\pm$  s.e.m.

**Supplementary Fig. 3.**  $Trpm8^{GFP}$  does not co-stain with cRet immunoreactivity. Bars equal 50  $\mu$ M.

Supplemental Fig 1.

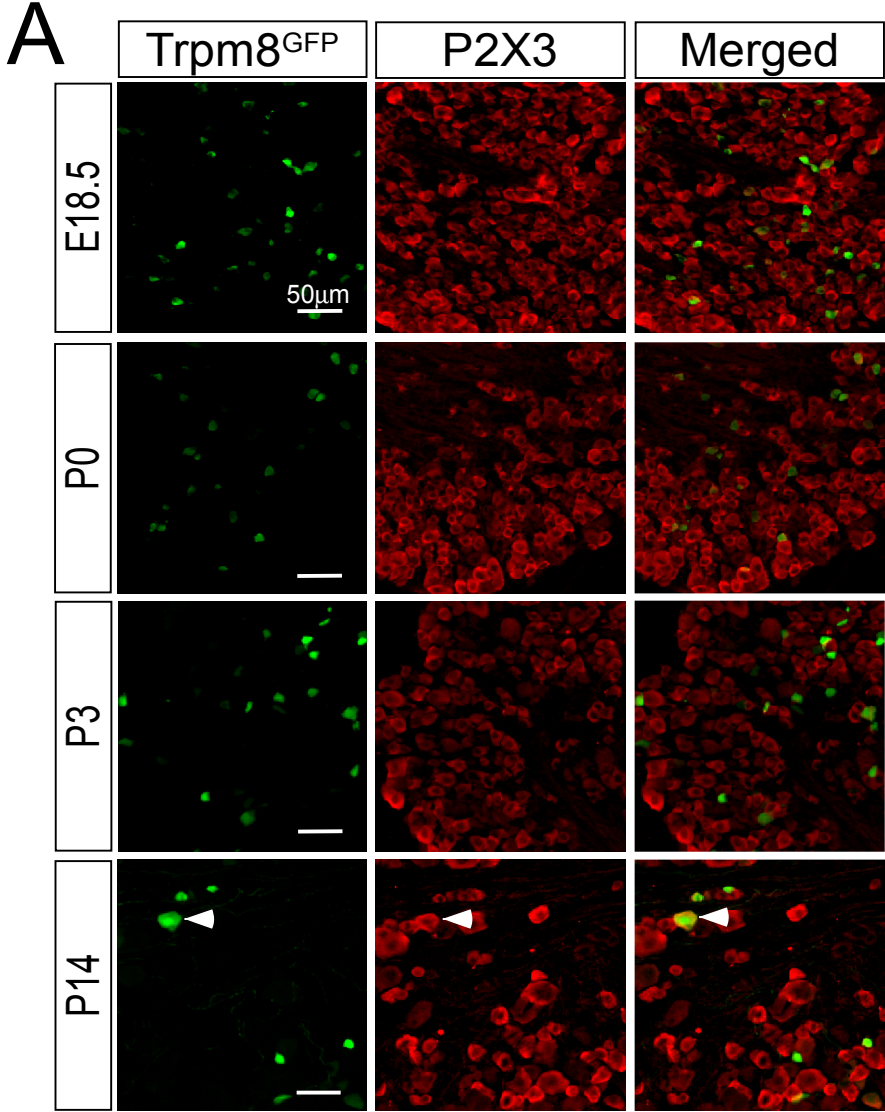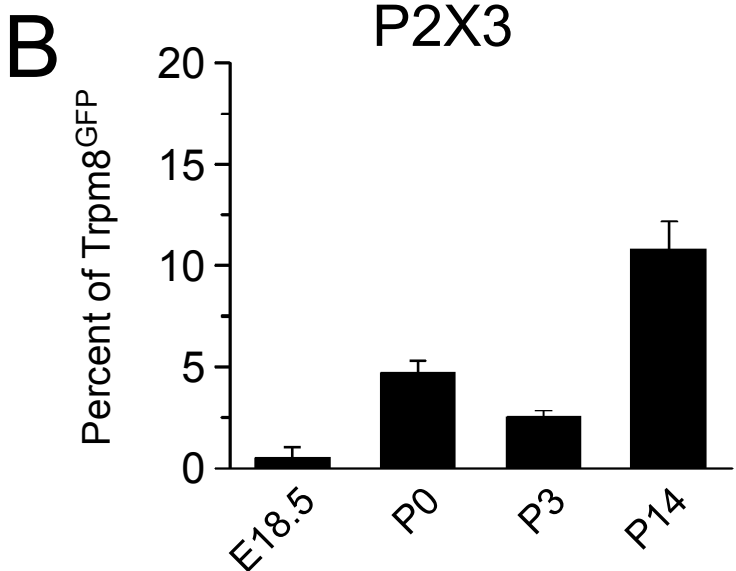

# Supplemental Fig 2

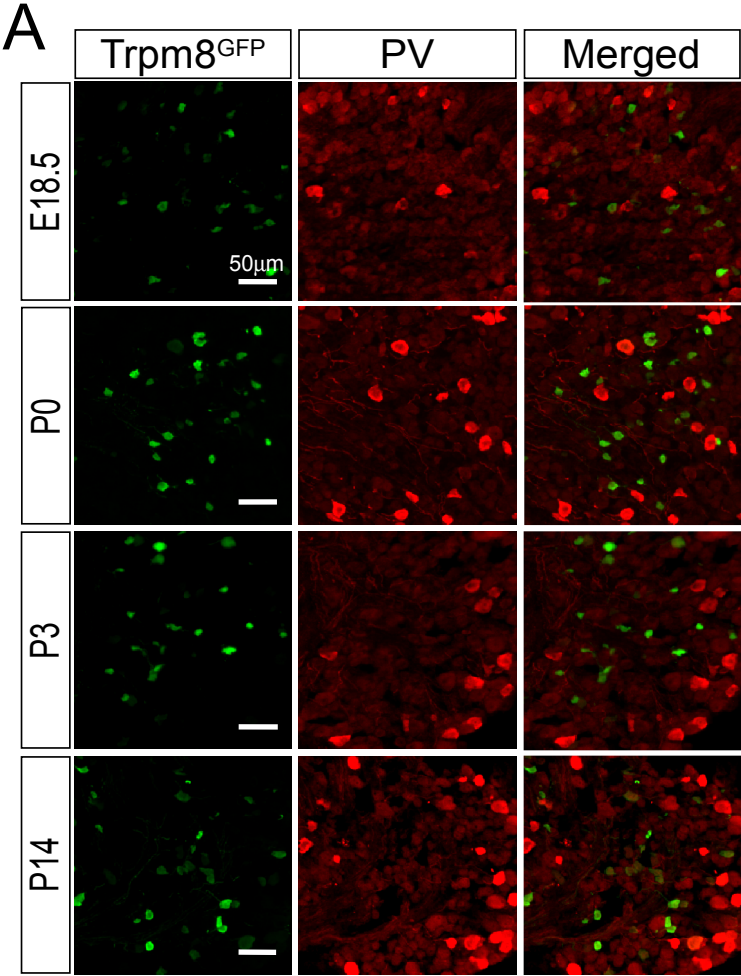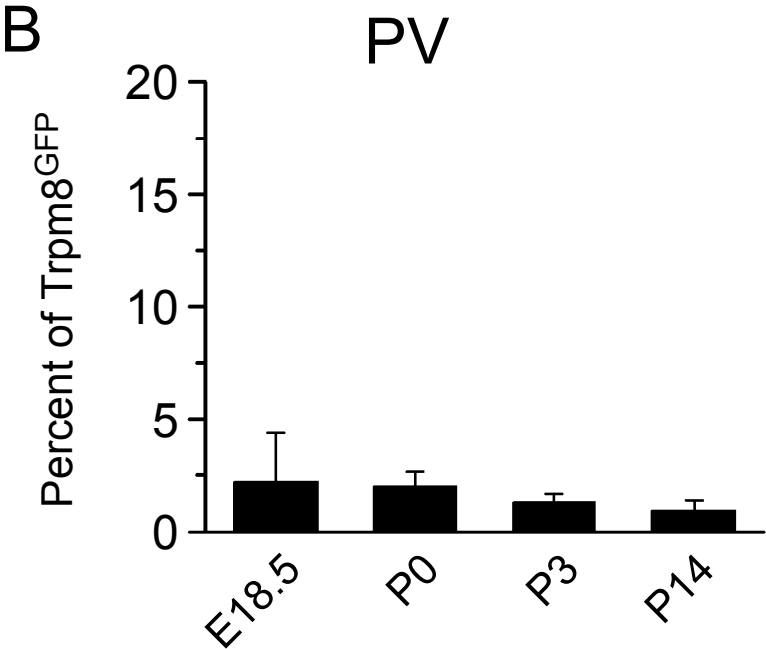

# Supplemental Fig 3.

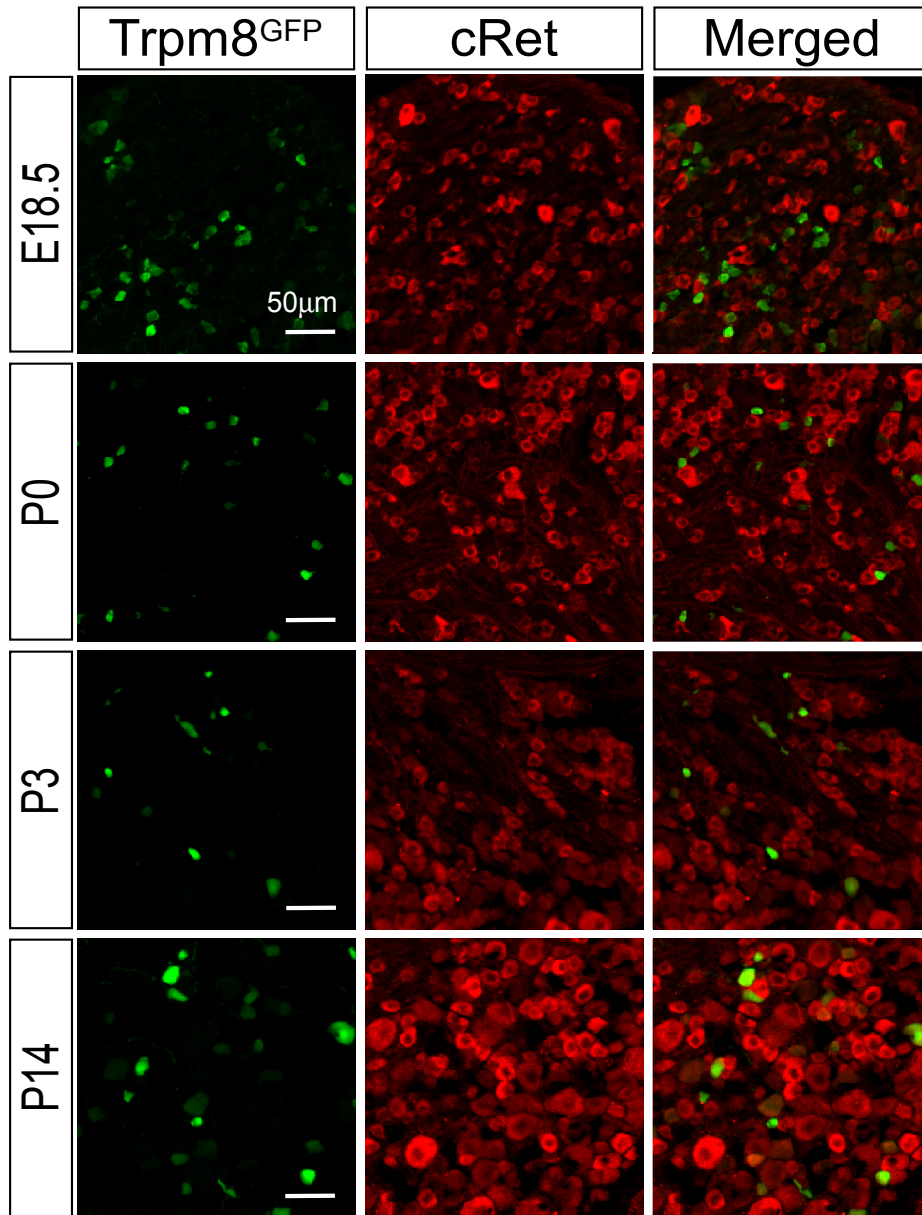

Supplement: NIHMS209629-supplement-01.pdf [file NIHMS209629-supplement-01.pdf]
